1 **BBX16 mediates the repression of seedling photomorphogenesis downstream of the GUN1-**  
2 **GLK1 module during retrograde signaling**

3 Nil Veciana<sup>1,\*</sup>, Guiomar Martín<sup>1,\*</sup>, Pablo Leivar<sup>2</sup>, Elena Monte<sup>1, 3, 4</sup>

4 <sup>1</sup> Centre for Research in Agricultural Genomics (CRAG) CSIC-IRTA-UAB-UB, Campus UAB,  
5 Bellaterra, Barcelona, Spain.

6 <sup>2</sup> Laboratory of Biochemistry, Institut Químic de Sarrià, Universitat Ramon Llull, Barcelona, Spain.

7 <sup>3</sup> Consejo Superior de Investigaciones Científicas (CSIC), Barcelona, Spain.

8 <sup>4</sup> Author for correspondence. Email: [elena.monte@cragenomica.es](mailto:elena.monte@cragenomica.es)

9 \*Equal contribution

10

11

## 12 **Summary**

- 13 • Plastid-to-nucleus retrograde signals (RS) initiated by dysfunctional chloroplasts impact  
14 photomorphogenic development. We previously showed that the transcription factor GLK1 acts  
15 downstream of the RS-regulator GUN1 in photodamaging conditions to regulate not only the well-  
16 established expression of photosynthesis-associated nuclear genes (*PhANGs*) but also to regulate  
17 seedling morphogenesis. Specifically, the GUN1/GLK1 module inhibits the light-induced PIF-  
18 repressed transcriptional network to suppress cotyledon development when chloroplast integrity is  
19 compromised, modulating the area exposed to potentially damaging high light. However, how the  
20 GUN1/GLK1 module inhibits photomorphogenesis upon chloroplast damage remained undefined.
- 21 • Here, we report the identification of *BBX16* as a novel direct target of GLK1. *BBX16* is induced  
22 and promotes photomorphogenesis in moderate light and it is repressed via GUN1/GLK1 after  
23 chloroplast damage. Additionally, we show that *BBX16* represents a regulatory branching point  
24 downstream of GUN1/GLK1 in the regulation of *PhANG* expression and seedling development  
25 upon RS activation.
- 26 • The *gun1* phenotype in lincomycin and the *gun1*-like phenotype of *GLK1OX* are markedly  
27 suppressed in *gun1bbx16* and *GLK1OXbbx16*.
- 28 • This study identifies *BBX16* as the first member of the *BBX* family involved in RS, and defines  
29 a molecular bifurcation mechanism operated by GLK1/*BBX16* to optimize seedling deetiolation,  
30 and to ensure photoprotection in unfavorable light conditions.

31

## 32 **Keywords**

33 B-BOX factor *BBX16*, chloroplast integrity and retrograde signaling, GLK1, GUN1,  
34 photomorphogenesis, photoprotection, light signaling, cotyledon opening.

35

## 36 **Introduction**

37 To cope with their sessile condition, plants need to optimize their growth and development in  
38 response to changes in their habitat. Light is a critical environmental component necessary for  
39 photosynthesis and for the regulation of growth and development (Arsovski *et al.*, 2012). Required  
40 as a primary source of energy and as an informative cue, light also represents a challenge for plant  
41 life when in excess. Plants have therefore evolved exquisite methods for light sensing and signaling  
42 to allow the appropriate adaptive response. Light of different wavelengths is perceived by different  
43 photoreceptors. Phytochromes sense red and far-red light (600-750 nm), whereas cryptochromes,  
44 phototropins, and Zeitlupes perceive blue and UVA (320-500 nm) and UVR8 senses UVB (Galvão  
45 & Fankhauser, 2015). Light perception by photoreceptors can be complemented by chloroplasts,  
46 which act as sensors of environmental changes and contribute to responses in high light (Chan *et*  
47 *al.*, 2016).

48 One of the most dramatic developmental transitions in plants is deetiolation, whereby a  
49 germinating seedling experiences light for the first time (Arsovski *et al.*, 2012; Gommers & Monte,  
50 2018). When germinating in the dark, skotomorphogenic seedlings growing heterotrophically  
51 exhibit fast-growing hypocotyls, unexpanded and appressed cotyledons with etioplasts, and  
52 formation of an apical hook to protect the apical meristem from damage. In the light, deetiolated  
53 or photomorphogenic seedlings adapt their morphology to enhance light capture for photosynthesis,  
54 which involves inhibition of hypocotyl elongation, hook unfolding, stimulation of cotyledon  
55 separation and expansion, and formation of the photosynthetic apparatus and fully functional  
56 chloroplasts.

57 Distinct transcriptomic landscapes underlay the skoto- and photo-morphogenic programs,  
58 regulated by a suite of positive and negative acting factors (Ma *et al.*, 2001; Jiao *et al.*, 2005; Shi  
59 *et al.*, 2018; Pham *et al.*, 2018; Jing & Lin, 2020). Major positive regulators are HFR1, HY5/HYH,  
60 and LAF1 (Lau & Deng, 2012; Xu *et al.*, 2015, 2016), whereas phytochrome-interacting factors  
61 (PIFs) act as major negative acting factors of photomorphogenesis (Castillon *et al.*, 2007; Leivar  
62 & Quail, 2011; Leivar & Monte, 2014). PIFs (PIF1, PIF3-8) are basic helix-loop-helix (bHLH)  
63 transcription factors (Toledo-Ortiz *et al.*, 2003) that bind to G-box (CACGTG) and PBE  
64 (CACATG) DNA elements in the dark to inhibit or activate the expression of light-induced or  
65 light-repressed genes, respectively (Leivar *et al.*, 2009; Zhang *et al.*, 2013; Pfeiffer *et al.*, 2014).  
66 The quadruple mutant *pifq* lacking PIF1, PIF3, PIF4 and PIF5 displays a partial constitutively

67 photomorphogenic phenotype in the dark, suggesting that PIFs promote skotomorphogenesis  
68 (Leivar *et al.*, 2008; Shin *et al.*, 2009). Upon illumination, phytochromes become active and trigger  
69 PIF inactivation and degradation through the 26S proteasome-mediated pathway, allowing  
70 seedlings to initiate light-regulated gene expression and follow a photomorphogenic program of  
71 development (Leivar *et al.*, 2008, 2009; Pham *et al.*, 2018). Additional transcription factors  
72 involved include the GOLDEN2-LIKE 1 (GLK1) and GLK2 (Chen *et al.*, 2016) and members of  
73 the B-BOX family (BBX) (Khanna *et al.*, 2009; Gangappa & Botto, 2014; Su *et al.*, 2015; Song *et al.*,  
74 *et al.*, 2020a). Whereas GLKs target genes involved in chlorophyll biosynthesis, light harvesting, and  
75 electron transport are necessary for chloroplast development (Fitter *et al.*, 2002; Waters *et al.*, 2008,  
76 2009; Oh & Montgomery, 2014; Zubo *et al.*, 2018), some BBX members have been described as  
77 general positive regulators of photomorphogenesis (eg BBX4/COL3, BBX11, BBX20/BZS1,  
78 BBX21/STH2, and BBX22/LZF1) (Datta *et al.*, 2006, 2007, 2008; Chang *et al.*, 2008; Fan *et al.*,  
79 2012; Xu *et al.*, 2018; Job & Datta, 2021), and some as negative (eg BBX18/DBB1a,  
80 BBX19/DBB1b, BBX24/STO, BBX25/STH, BBX28, BBX29, BBX30, BBX31, and  
81 BBX32/EIP6) (Datta *et al.*, 2006; Khanna *et al.*, 2006; Indorf *et al.*, 2007; Kumagai *et al.*, 2008;  
82 Holtan *et al.*, 2011; Wang *et al.*, 2011, 2015; Gangappa *et al.*, 2013; Lin *et al.*, 2018; Heng *et al.*,  
83 2019b; Song *et al.*, 2020b; Ravindran *et al.*, 2021). In addition, the role in photomorphogenesis of  
84 BBX23/MIDA10 appears to be organ-specific (positive for hypocotyl elongation (Zhang *et al.*,  
85 2017) and negative for hook unfolding (Sentandreu *et al.*, 2011). The protein stability of several  
86 of these transcription factors (e.g. HY5, LAF1, HFR1, BBX21, BBX22, and others) is directly  
87 modulated by the COP1/SPA complex acting as an E3 ubiquitin ligase, which interacts and targets  
88 them for degradation via the 26S proteasome pathway in darkness (Yi & Deng, 2005; Hoecker,  
89 2017).

90 In Arabidopsis, chloroplast biogenesis during seedling deetiolation depends on the expression of  
91 chloroplast proteins encoded by the nuclear genome (~2000–3000) (Li & Chiu, 2010) (anterograde  
92 regulation), which are imported into the chloroplast following synthesis in the cytosol (Jung &  
93 Chory, 2010). In turn, chloroplasts can communicate with the nucleus through retrograde signaling  
94 (RS) to regulate nuclear gene expression according to chloroplast status (Kleine *et al.*, 2009; Jarvis  
95 & López-Juez, 2014). This coordination between the nucleus and chloroplast genomes ensures  
96 optimized photosynthetic capacity and growth (Ruckle *et al.*, 2007; Hills *et al.*, 2015; Martín *et al.*,  
97 *et al.*, 2016). Moderate light intensities during deetiolation induce expression of the PIF-repressed

98 target gene *GLK1* (Martín *et al.*, 2016), and *GLK1* subsequently promote photosynthetic apparatus  
99 formation by directly inducing the expression of nuclear-encoded photosynthetic genes (*PhANGs*)  
100 such as those from the *LHCb* gene family (Waters *et al.*, 2009). Under photodamaging conditions,  
101 however, RS is activated (Ruckle *et al.*, 2007; Estavillo *et al.*, 2011; Kindgren *et al.*, 2012) leading  
102 to the repression of *GLK1* expression and down-regulation of *PhANGs* (Waters *et al.*, 2009; Martín  
103 *et al.*, 2016). The use of drugs such as lincomycin or norflurazon specifically inhibits plastid  
104 translation or carotenoid biosynthesis, respectively, and activates RS causing photobleaching and  
105 repression of *PhANG* expression (Oelmüller *et al.*, 1986; Sullivan & Gray, 1999). *Genomes*  
106 *uncoupled* (*gun*) mutants exhibit *PhANG* derepression in response to these drugs, and have helped  
107 elucidate components of RS like tetrapyrroles such as heme, and *GUN1* (Koussevitzky *et al.*, 2007;  
108 Chan *et al.*, 2016). Importantly, RS has been shown to impact light-regulated seedling  
109 development in high light environments to prevent photodamage, through a *GUN1*-mediated  
110 mechanism that is still not well defined (Ruckle *et al.*, 2007; Martín *et al.*, 2016). It is also currently  
111 unknown whether light regulation of seedling development and *PhANG* expression after RS  
112 activation operate through the same components.

113 We have previously shown that the RS and phytochrome pathways converge to antagonistically  
114 regulate the PIF-repressed light-induced transcriptional network (Martín *et al.*, 2016). Our findings  
115 showed that *GLK1* acts downstream of *GUN1* to modulate not only *PhANG* expression but also  
116 seedling morphogenesis in photodamaging conditions. Specifically, *GUN1/GLK1*-mediated RS  
117 antagonize phytochrome/PIF signaling to inhibit cotyledon separation and expansion when  
118 chloroplast integrity is compromised, effectively reducing the area exposed to potentially  
119 damaging high light. How this is achieved is still unclear, but does not involve the reaccumulation  
120 of PIF proteins in these conditions (Martín *et al.*, 2016), thus suggesting the participation of yet  
121 undefined components (Fig. S1). Here, we address the question of how the *GUN1/GLK1* module  
122 inhibits photomorphogenesis upon chloroplast damage, and report the identification and  
123 characterization of *BBX16* as a novel *GLK1* target. *BBX16* promotes photomorphogenesis  
124 downstream of PIF and *GLK1* in moderate light and is repressed via the *GUN1/GLK1* module  
125 after chloroplast damage. Additionally, we show that *BBX16* represents a regulatory branching  
126 point in the regulation of *PhANG* expression and seedling development upon RS activation.

127

## 128 **Materials and Methods**

## 129 **Plant material and growth conditions**

130 *Arabidopsis thaliana* wild-type and mutant seeds used in this study have been described previously.  
131 *gun1* (*gun1-201*) (Martín *et al.*, 2016), *glk1* and *glk1glk2* (Fitter *et al.*, 2002), *GLK1OX* and  
132 *GLK1OX-GFP* (both in *glk1glk2* background) (Waters *et al.*, 2008) are in Col-0 background,  
133 whereas *col7*, *BBX16OX #10* and *BBX16OX #11* (here renamed as *bbx16-1*, *BBX16OX1* and  
134 *BBX16OX2*, respectively) (Wang *et al.*, 2013b) are in Col-4 background. *BBX16OX* lines express  
135 the *BBX16* open reading frame under the control of the 35S promoter and were described to  
136 overexpress BBX16 ~250 fold (Wang *et al.*, 2013b). *bbx16-1* is an insertional mutant from the  
137 GABI-Kat collection (GABI-639C04) with a T-DNA insertion in the second exon of *BBX16*  
138 (Wang *et al.*, 2013b). A new second BBX16 mutant allele (named *bbx16-2*) was obtained from the  
139 SALK collection (SALK\_036059), harboring a T-DNA insertion in the first exon (Fig. S2). The  
140 *gun1bbx16-1* was obtained by crossing *gun1-201* to *bbx16-1*, and WT (Col-0 x Col-4 background),  
141 *gun1* and *bbx16* siblings from the cross were selected to be used in the experiments shown in Fig.  
142 4. *GLK1OXbbx16-1* and *GLK1OXbbx16-2* were generated by crossing *GLK1OX* to *bbx16-1* and  
143 to *bbx16-2*, respectively. The obtained mutants were selected to maintain the *glk1glk2* background  
144 in *GLK1OX*, and *GLK1OX* siblings from each cross were selected to be used as controls in the  
145 experiments shown in Fig. 4 and Fig. S4. Seeds were surface-sterilized in 20% bleach and 0.25%  
146 SDS for 10 minutes and plated on 0.5X Murashige and Skoog (MS) without sucrose, stratified at  
147 4°C in the dark for 4 days, exposed to white light for 3 hours to induce germination, and then  
148 placed to the specific light conditions indicated in each experiment. For experiments done under  
149 continuous conditions, plates were placed under white light ( $5 \mu\text{mol}\cdot\text{m}^{-2}\cdot\text{s}^{-1}$ ) or darkness for 3  
150 days (unless otherwise indicated), except in experiments shown in Fig. 2d, performed using a light  
151 intensity of  $20 \mu\text{mol}\cdot\text{m}^{-2}\cdot\text{s}^{-1}$ , in Fig. 3f and Fig. 4b, where light was  $10 \mu\text{mol}\cdot\text{m}^{-2}\cdot\text{s}^{-1}$ , and in Fig.  
152 3e, in which the light conditions consists in a combination of red (60%) and blue (40%) light,  
153 where light corresponds to  $130 \mu\text{mol}\cdot\text{m}^{-2}\cdot\text{s}^{-1}$  and high light to  $310 \mu\text{mol}\cdot\text{m}^{-2}\cdot\text{s}^{-1}$ . In the text we refer  
154 to low light ( $<25 \mu\text{mol}\cdot\text{m}^{-2}\cdot\text{s}^{-1}$ ), light ( $100\text{-}150 \mu\text{mol}\cdot\text{m}^{-2}\cdot\text{s}^{-1}$ ), and high light ( $>300 \mu\text{mol}\cdot\text{m}^{-2}\cdot\text{s}^{-1}$ ),  
155 whereas the specific light intensity used in each experiment is specified in the corresponding figure  
156 legend. For lincomycin treatments, media was supplemented with 0.5 mM lincomycin (Sigma  
157 L6004) (Sullivan & Gray, 1999). Primers sequences used for genotyping are provided in Table S1.

## 158 **Phenotypic measurements and statistical analysis**

159 Hypocotyl length, cotyledon area and cotyledon aperture were measured as described (Sentandreu  
160 *et al.*, 2011), by using NIH Image software (Image J, National Institutes of Health). Median was  
161 calculated from at least 20 seedlings and the experiments were repeated at least two times with  
162 similar results. Statistical analysis between genotypes was performed by the Kruskal-Wallis test  
163 (P value < 0.05), and Mann-Whitney test was used for pairwise comparisons.

#### 164 **Quantitative Reverse Transcriptase (qRT-PCR)**

165 For qRT-PCR analysis, seedlings were grown in the dark or in white light for the indicated time.  
166 qRT-PCR was performed as described previously (Khanna *et al.*, 2007) with variations. Briefly,  
167 in Figures 1a and 3b-d, 1 µg of total RNA extracted with the RNeasy Plant Mini Kit (Qiagen) was  
168 treated with DNaseI (Ambion) according to the manufacturer's instructions. First-strand cDNA  
169 synthesis was performed using the SuperScript III reverse transcriptase (Invitrogen) and oligo dT  
170 as a primer (dT30). In Figures 1b and 6, 1µg of total RNA extracted using Maxwell® RSC Plant  
171 RNA Kit (Promega) and first strand cDNA synthesis was performed using the NZY First-Strand  
172 cDNA Synthesis Kit (NZYTech). In all cases, cDNA was then treated with RNase Out (Invitrogen)  
173 before 1:20 dilution with water, and 2µl of this mix was used for real-time PCR (Light Cycler 480;  
174 Roche) using SYBR Premix Ex Taq (Roche) and primers at a 300nM concentration. Gene  
175 expression was usually measured in three independent biological replicates, and at least two  
176 technical replicates were done for each of the biological replicates. *PP2A (ATIG13320)* was used  
177 for normalization as described (Shin *et al.*, 2007). Primers sequences used for qRT-PCR are  
178 described in Table S2.

#### 179 **Chromatin Immunoprecipitation (ChIP) Assay**

180 Chromatin immunoprecipitation (ChIP) and ChIP-qPCR assays (Fig. 4) were performed as in  
181 (Martín *et al.*, 2018) using the previously described *35S::GLK1OX-GFP* line (Waters *et al.*, 2008).  
182 Seedlings (3g) were vacuum-infiltrated with 1 % formaldehyde and cross-linking was quenched  
183 by vacuum infiltration with 0.125 M glycine for 5 min. Tissue was ground, and nuclei-containing  
184 cross-linked protein and DNA were purified by sequential extraction on Extraction Buffer 1 (0.4  
185 M Sucrose, 10 mM Tris-HCl pH 8, 10 mM MgCl<sub>2</sub>, 5 mM β-mercaptoethanol, 0.1 mM PMSF, 50  
186 mM MG132, proteinase inhibitor cocktail), Buffer 2 (0.25 M Sucrose, 10 mM Tris-HCl pH 8, 10  
187 mM MgCl<sub>2</sub>, 1 % Triton X-100, 5 mM β-mercaptoethanol, 0.1 mM PMSF, 50 mM MG132,  
188 proteinase inhibitor cocktail), and Buffer 3 (1.7 M Sucrose, 10 mM Tris-HCl pH 8, 0.15 % Triton

189 X-100, 2 mM MgCl<sub>2</sub>, 5mM β-mercaptoethanol, 0.1 mM PMSF, 50 mM MG132, proteinase  
190 inhibitor cocktail). Nuclei were resuspended in nuclei lysis buffer (50 mM Tris-HCl pH8, 10 mM  
191 EDTA, 1 % SDS, 50 mM MG132, proteinase inhibitor cocktail), sonicated 10 times for 30sec each,  
192 and diluted in 10 volumes of Dilution Buffer (0.01 % SDS, 1 % Triton X-100, 1.2 mM EDTA,  
193 16.7 mM Tris-HCl pH8, 167 mM NaCl). Overnight incubation was performed with the  
194 corresponding antibody (or with no antibody as control) at 4 °C overnight, and  
195 immunoprecipitation was performed using Dynabeads. Washes were done sequentially in Low  
196 Salt Buffer (0.1 % SDS, 1 % Triton X-100, 2 mM EDTA, 20 mM Tris-HCl pH 8, 150 mM NaCl),  
197 High Salt Buffer (0.1 % SDS, 1 % Triton X-100, 2 mM EDTA, 20 mM Tris-HCl pH 8, 500 mM  
198 NaCl), LiCl Buffer (0.25M LiCl, 1 % NP40, 1 % deoxycholic acid sodium, 1 mM EDTA, 10 mM  
199 Tris-HCl pH 8), and 1x TE. Immunocomplexes were eluted in Elution Buffer (1% SDS, 0.1M  
200 NaHCO<sub>3</sub>), de-cross-linked overnight at 65 °C in 10 mM NaCl, and then treated with proteinase K.  
201 DNA was purified using QIAGEN columns, eluted in 100 μL of QIAGEN elution buffer, and 2μL  
202 were used for qPCR (ChIP-qPCR) using *BBX16* promoter-specific primers (Table S2) spanning  
203 the regions P1 (EMP1180-P1 and EMP1182-P1) and P2 (EMP1175-P2 and EMP1176-P2)  
204 containing the predicted binding sites for GLK1 (Waters *et al.*, 2009; Franco-Zorrilla *et al.*, 2014),  
205 and a pair of primers inside the *BBX16* gene body as control (EMP869-P3 and EMP1177-P3) (see  
206 schematics in Fig. 5a). Three biological replicates were performed for *35S::GLK1-GFP* (Waters  
207 *et al.*, 2008) incubated with and without antibody. WT controls were performed with one replicate  
208 of Col-0 seedlings with and without antibody.

209

## 210 **Results**

### 211 **1- *BBX16* is a PIF-repressed gene that is induced by light in a GLK1-dependent manner**

212 To elucidate how the PIF/GLK1 and GUN1/GLK1 modules regulate cotyledon development under  
213 different light conditions, we aimed to identify genes downstream of GLK1 that might be involved  
214 in the regulation of photomorphogenesis. We reasoned that plausible candidates would need to  
215 meet the following criteria: (1) be a light-induced gene in a GLK1-dependent manner, and PIF  
216 repressed in dark; (2) promote cotyledon development under moderate light; (3) be a high light-  
217 and lincomycin-repressed gene via the GUN1/GLK1 module; and (4) display reduced sensitivity  
218 to RS-inducing treatments when overexpressed in seedlings, preventing RS repression of



219 cotyledon development. Additionally, to verify the importance of the selected candidate  
220 (represented as X), (5) genetic removal of X in *gun1* and *GLK1OX* mutants should suppress their  
221 phenotype in lincomycin at least partly (Fig. S1).

222 To begin our search, we made use of previous data describing genes directly targeted and up-  
223 regulated by GLKs (Waters *et al.*, 2009). We observed that these targets (119 in total) not only  
224 included chloroplast-localized photosynthetic genes (the main focus of Waters *et al.* work).  
225 Significantly, we observed among them an enrichment of genes encoding for BBX transcription  
226 factors, with four of the described 32 BBX family members being present in the list of 119 genes  
227 (p-value: 2.46 e-05). Moreover, three of these BBX were members of subclass III, which is  
228 composed by four members (BBX14-BBX17). Different BBX proteins have been involved in  
229 several aspects of light-regulated development (Gangappa & Botto, 2014). In particular,  
230 BBX16/COL7 has been described to play a role in shade responses (Wang *et al.*, 2013b; Zhang *et*  
231 *al.*, 2014), and was considered a good candidate for further characterization.

232 To start to evaluate this candidate, *BBX16* expression was analyzed in dark- and light-grown wild-  
233 type (WT), GLK1-deficient *glk1* and *glk1glk2* (Fitter *et al.*, 2002), and *GLK1*-overexpression  
234 *GLK1OX* (Waters *et al.*, 2008) seedlings. *BBX16* was strongly up-regulated in light-grown WT  
235 seedlings compared to dark, and this induction required GLK1 (Fig. 1a). *BBX16* is a PIF-repressed  
236 gene, although not described as direct target (Pfeiffer *et al.*, 2014). As such, in *pifq* etiolated  
237 seedlings, *BBX16* expression showed high levels of expression compared to WT (Fig. 1a).  
238 Interestingly, the expression of the other *BBX* in the same clade showed a similar pattern except  
239 for *BBX17* (Fig. S3), suggesting that BBX14 and BBX15 might share some function with BBX16,  
240 although the fact that *BBX16* is expressed to much higher levels (Fig. S3) might be indicative of a  
241 more important contribution. Furthermore, *GLK1* overexpression in the dark induces *BBX16*  
242 expression (Fig.1b). Together, these results indicate that during seedling establishment, *BBX16* is  
243 a PIF-repressed gene in the dark that is light-induced in a GLK1-mediated manner. Thus, the  
244 identified BBX16 met our first criterion (Fig. S1) and was considered for further genetic and  
245 molecular analyses.

## 246 **2- BBX16 promotes cotyledon development during seedling deetiolation**

247 Next, to evaluate the role of BBX16 during deetiolation, we analyzed the previously described  
248 *bbx16* T-DNA insertion mutant line *col7* (referred here as *bbx16-1* for clarity), a newly  
249 characterized *bbx16-2* line (see Methods and Fig. S2), and two overexpressing *BBX16* lines (*OX1*

250 and *OX2*) (Wang *et al.*, 2013b). Under 3 days of continuous low light conditions, deficiency of  
251 *BBX16* in the *bbx16* mutants led to significantly reduced cotyledon area compared to the WT,  
252 whereas cotyledons in *BBX16-OX1* and *OX2* were more expanded (Fig. 2a,b). *BBX16-OX1* and  
253 *OX2* also showed slightly shorter hypocotyls (Fig. 2c). In addition, dark-grown OX lines displayed  
254 faster cotyledon aperture compared to WT after light exposure (Fig. 2d). Together, these results  
255 indicate that *BBX16* contributes to the promotion of early photomorphogenesis with a role in  
256 cotyledon development (and therefore fulfills the second criterion, Fig. S1), and a possible minor  
257 contribution to the inhibition of hypocotyl elongation.

### 258 **3- Under photo-damaging conditions, inhibition of cotyledon separation involves GUN1-** 259 **mediated repression of *BBX16*.**

260 Next, *BBX16* expression was analyzed under conditions where chloroplast integrity is  
261 compromised by lincomycin treatment, an inhibitor of chloroplast translation that specifically  
262 damages the chloroplast under both dark and light conditions (Sullivan & Gray, 1999). When  
263 chloroplast is perturbed, activation of RS induces down-regulation of *GLK1* expression in a  
264 GUN1-mediated manner impacting cotyledon development (Martín *et al.*, 2016). We hypothesized  
265 that under these conditions, repression of *GLK1* should also result in the repression of *BBX16*  
266 expression as a downstream effector of *GLK1* (criterion 3, Fig. S1). Notably, lincomycin treatment  
267 prevented de-repression of *BBX16* in dark-grown *pifq* (Fig. 3a). Moreover, the light-induced  
268 expression of *BBX16* shown in Fig. 1 was strongly inhibited in response to lincomycin in WT  
269 seedlings (Figs. 3b, 3c), similarly to the reported inhibition of *PhANGs* and *GLK1* expression  
270 (Martín *et al.*, 2016). Importantly, the inhibition of *BBX16* expression in lincomycin was only  
271 partial in *GLK1OX* (Fig. 3b), similar to *gun1* mutant (Fig. 3c).

272 The biological relevance of these findings using lincomycin was assessed by testing *BBX16*  
273 expression under chloroplast photo-damaging conditions. Induction of *BBX16* in high light in WT  
274 was reduced compared to normal light (Fig. 3d), suggesting that high-light damage partially  
275 inhibits *BBX16* induction, in agreement with recent transcriptomic data obtained under high light  
276 stress (Huang *et al.*, 2019). This effect was not observed in GUN1-deficient mutants (Fig. 3d),  
277 indicating that this repression is mediated by GUN1. These results are in accordance with  
278 previously observed inhibition of *GLK1* under similar conditions (Martín *et al.*, 2016) and suggest  
279 that the light induction of *BBX16* downstream of *GLK1* is repressed in conditions where RS is  
280 active and inhibits *GLK1* function.

281 Next, we tested whether the transcriptional repression of *BBX16* in response to RS might contribute  
282 to the inhibition of seedling deetiolation upon chloroplast damage previously observed (Martín *et*  
283 *al.*, 2016). Indeed, *BBX16OX* lines grown for three days in plates containing lincomycin under  
284 light were less sensitive to lincomycin and were able to deetiolate, showing a cotyledon aperture  
285 that was similar to WT seedlings without lincomycin (Fig. 3e). Likewise, in a deetiolation  
286 experiment using 2-day old dark-grown seedlings transferred to light in the presence of lincomycin,  
287 *BBX16OX* lines showed reduced sensitivity to lincomycin like *gun1*, and displayed higher  
288 cotyledon angles compared to WT (Fig. 3f). These results indicate that BBX16 also fulfills criteria  
289 3 and 4 (Fig. S1), and provide strong support that RS-imposed GUN1/GLK1-mediated repression  
290 of *BBX16* is necessary for the inhibition of cotyledon development under conditions where  
291 chloroplast is damaged.

292 Importantly, to provide conclusive support for this pathway, we next tested the genetic interactions  
293 between GLK1, GUN1 and BBX16 (criterion 5, Fig. S1). Genetic removal of *BBX16* in  
294 *GLK1OXbbx16* and *gun1bbx16-1* mutants allowed us to determine the contribution of the  
295 endogenous *BBX16* to the cotyledon phenotypes of *GLK1OX* and *gun1* in lincomycin (Fig. 4 and  
296 S4). Remarkably, the *gun1-like* phenotype of *GLK1OX* in lincomycin was clearly suppressed in  
297 *GLK1OXbbx16*, both in *GLK1OXbbx16-1* (Fig. 4a) and *GLK1OXbbx16-2* alleles (Fig. S4).  
298 Likewise, the *gun1bbx16-1* double mutant showed strong suppression of the open cotyledon  
299 phenotype of *gun1* (Fig. 4b). Together, we conclude that BBX16 is a promoter of cotyledon  
300 photomorphogenesis in moderate light that is targeted by the GUN1/GLK1 module under high  
301 light conditions to protect the seedling by reducing the exposed cotyledon surface.

#### 302 **4- GLK1 associates with the promoter of *BBX16***

303 To further understand the mechanism by which the light environment impacts development  
304 through the GLK1 regulation of *BBX16* expression, we aimed to test whether *BBX16* is a direct  
305 downstream target of GLK1 during deetiolation. Interestingly, analysis of the promoter region of  
306 *BBX16* revealed two CCAATC motifs, described as putative GLK1 binding sequences by Waters  
307 *et al.* (2009) based on the enrichment in the promoter regions of GLK1 targets. These two motifs  
308 are 2,101 bp (Motif 1) and 767 bp (Motif 2) upstream of the transcriptional start site (TSS) (Fig.  
309 5a). Chromatin immunoprecipitation (ChIP) followed by qPCR in light-grown seedlings  
310 expressing GLK1-GFP (Waters *et al.*, 2008) detected strong specific binding of GLK1 to the  
311 *BBX16* promoter specifically in the region that spans Motif 2 (P2), whereas no binding was

312 detected to the region containing Motif 1 (P1) or a control sector within the gene body (P3) (Fig.  
313 5b). This result indicates that *BBX16* is indeed a direct target of GLK1 during seedling deetiolation.  
314 Interestingly, we observed that the region spanning Motif 2 also contained an AGATTCT sequence  
315 in the reverse strand, identified as a potential GLK1 binding site by using protein-binding  
316 microarrays (Franco-Zorrilla *et al.*, 2014). It is currently unknown whether the two binding  
317 elements in the region spanning Motif 2 are necessary for GLK1 association to the *BBX16*  
318 promoter.

### 319 **5- BBX16 mediates regulation of only some GLK1-regulated *PhANG* genes**

320 GLKs are key regulators of *PhANGs* (Waters *et al.*, 2009; Zubo *et al.*, 2018). To test whether  
321 BBX16 participates in the downregulation of *PhANG* expression in response to retrograde signals,  
322 we next studied expression of the described RS-regulated *PhANGs* *LCHB1.4*, *LHCB.2.2*, *CAI*,  
323 *RBCS1A*, and *RBCS3B* (Waters *et al.*, 2009), in low light-grown WT, *bbx16*, *BBX16OX*, *gun1*,  
324 *GLK1OX*, and *GLK1OXbbx16-1* seedlings. In the absence of lincomycin, *LCHB1.4* and *LHCB.2.2*  
325 expression was similar to WT in all lines tested except in *GLK1OX*, where expression of both  
326 genes was upregulated as described (Waters *et al.*, 2009), and in *BBX16-OX*, where *LHCB.2.2*  
327 expression was ~2-fold higher compared to WT (Fig. 6). In response to lincomycin, expression in  
328 *gun1* and *GLK1OX* lines was derepressed in accordance to Waters *et al.* (2009), whereas  
329 expression in *BBX16-OX* seedlings was similar to WT (Fig. 6). In clear contrast, expression of  
330 *CAI*, *RBCS1A*, and *RBCS3B* was similar to WT in all lines in the absence of lincomycin, but  
331 interestingly their expression in *BBX16OX* in the presence of lincomycin was derepressed  
332 compared to WT, similarly to *gun1* (Fig.6). Together, these results can be interpreted to suggest  
333 that BBX16 does not mediate the regulation of the *LCHB1.4* and *LHCB.2.2* upon chloroplast  
334 damage, whereas BBX16OX exhibits a *gun*-like phenotype for some *PhANGs* such as *CAI*,  
335 *RBCS1A*, and *RBCS3B*. This difference may be indicative of branching in signaling downstream  
336 of GLK1, whereby GLK1-mediated regulation of some *PhANGs* might be indirect through  
337 transcriptional regulation of *BBX16* and possibly other factors. Indeed, whereas *LCHB1.4* and  
338 *LHCB.2.2* were described as GLK1 primary targets, *CAI*, *RBCS1A*, and *RBCS3B* failed to meet  
339 the criteria to be considered in this group (Waters *et al.*, 2009). Importantly, *CAI*, *RBCS1A*, and  
340 *RBCS3B* transcript levels in lincomycin were similar in *GLK1OX* and *GLK1OXbbx16* (Fig. 6).  
341 This was in contrast to the clear suppression of the *GLK1OX* cotyledon phenotype in

342 *GLK1**Oxbbx16* shown above (Fig. 4), suggesting that for *PhANG* expression the contribution of  
343 endogenous *BBX16* under these conditions might be relatively small.

## 344 Discussion

345 The establishment of young seedlings after germination is a highly vulnerable process regulated  
346 by a myriad of factors, light being one of the most important (Gommers & Monte, 2018). Light  
347 induces transcriptional changes of hundreds of genes involved in deetiolation (Ma *et al.*, 2001),  
348 many of them directly regulated by the phytochrome/PIF system, including *GLK1* (Leivar *et al.*,  
349 2009; Pfeiffer *et al.*, 2014). However, because too much light is detrimental for chloroplast  
350 function and can hinder establishment, seedlings in potentially photodamaging light initiate  
351 retrograde signaling (RS) and inhibit deetiolation (Ruckle *et al.*, 2007; Martín *et al.*, 2016). This  
352 process is mediated by the nuclear-encoded chloroplast-localized PRR protein GUN1, which  
353 accumulates preferentially during early stages of chloroplast biogenesis and under retrograde  
354 signaling conditions (Wu *et al.*, 2018), through a process that is not yet well understood but may  
355 require physically interaction with a large number of proteins (Pesaresi & Kim, 2019; Jiang &  
356 Dehesh, 2021; Wu & Bock, 2021) involved in plastid translation machinery (Tadini *et al.*, 2016;  
357 Marino *et al.*, 2019), tetrapyrrole biosynthesis (Shimizu *et al.*, 2019), RNA editing (Zhao *et al.*,  
358 2019), and plastidial import (Khanna *et al.*, 2009; Wu *et al.*, 2019; Tadini *et al.*, 2020). Given all  
359 these putative interactions, GUN1 has been proposed to act as scaffold protein that promotes  
360 protein complex formation (Colombo *et al.*, 2016), and may allow GUN1 to function as integrator  
361 of signals from several retrograde signaling pathways. Downstream of GUN1, the nuclear  
362 localized GLKs directly regulate *PhANG* expression to inhibit chloroplast development (Waters  
363 *et al.*, 2009). The GUN1/GLK1 module has also been shown to be central in the regulation of  
364 seedling morphology, although how this takes place was unknown (Martín *et al.*, 2016). Here, we  
365 show that *GLK1* directly induces *BBX16* to promote cotyledon development during seedling  
366 deetiolation in light conditions sustaining normal photosynthetic activity. In contrast, activation of  
367 RS under high light prevents *BBX16* upregulation through GUN1-mediated repression of *GLK1*,  
368 and this keeps the cotyledons underdeveloped to reduce the photosynthetic tissues exposed to light.  
369 Therefore, the identification of *BBX16* as a direct target of *GLK1* in the regulation of  
370 photomorphogenesis defines a new molecular mechanism to optimize development during  
371 seedling deetiolation and to ensure photoprotection of the organism in unfavorable light conditions  
372 (Fig. 7).

373 **BBX16 defines a signal branching hub in chloroplast-to-nucleus retrograde signaling**  
374 **downstream of the GUN1/GLK1 module**

375 Our finding that GLK1 targets *BBX16* to regulate cotyledon development and to possibly regulate  
376 some *PhANGs* indirectly, whereas other *PhANGs* are directly regulated by GLK1, establishes a  
377 branching point in the regulation of seedling morphology downstream of the GUN1/GLK1 module,  
378 and indicates that the signal that GLK1 relays diversifies to specifically regulate different  
379 processes central to seedling deetiolation. Signaling network branching is common in all  
380 organisms and contributes to establishing complex responses to a given unique stimulus (Purvis et  
381 al., 2008). Interestingly, signal branching was previously described downstream of the PIFs to  
382 regulate different organ-specific pathways during seedling deetiolation (Sentandreu *et al.*, 2011),  
383 where the BBX protein BBX23/MIDA10 was shown to predominantly regulate hook unfolding.  
384 Here, whereas direct GLK1 targeting of some *PhANG* genes might allow for fast regulation of  
385 chloroplast protection to e.g. fluctuations in light conditions, branching of the signal to repress  
386 *BBX16* and its target effectors would entail a slower response to arrest cotyledon development  
387 only in more sustained high light conditions, a possibility that needs further investigation.

388 **BBX16 is the first described BBX protein involved in Retrograde Signaling.**

389 Our finding that BBX16 is a downstream target of the GUN1/GLK1 module in RS regulated  
390 development identifies the first BBX protein involved in the response to chloroplast photodamage.  
391 This adds to previously described members of the BBX family with regulatory roles in stress-  
392 induced signaling pathways, such as BBX24/STO in responses to salt (Nagaoka & Takano, 2003),  
393 BBX18 and BBX23 to heat (Wang *et al.*, 2013a; Ding *et al.*, 2018), or BBX7 and BBX8 to cold  
394 stress (Li *et al.*, 2021). In addition, altered expression levels of *BBX19* were found in *ceh1*, a mutant  
395 with high levels of the MEcPP retrograde signal (Xiao *et al.*, 2012), although the significance is  
396 still unclear (Wang *et al.*, 2014). Interestingly, a recent bioinformatic analysis of the *BBX* family  
397 identified that the promoter region of *BBX16* contains cis elements predicted to be abscisic acid,  
398 low temperature and drought responsive (Lyu *et al.*, 2020), which could indicate a role for BBX16  
399 in the cross-talk between different stress pathways.

400 The BBX family in *Arabidopsis thaliana* consists of 32 proteins arranged into five structural  
401 groups (I-V) based on the number of B-Box motifs (one or two) and the presence or absence of a  
402 CCT domain and a VP motif (Robson *et al.*, 2001; Kumagai *et al.*, 2008; Khanna *et al.*, 2009;  
403 Gangappa & Botto, 2014). BBX16/COL7 belongs to the Class III clade, the least characterized of

404 the BBX groups, together with BBX14/COL6, BBX15/COL16 and BBX17/COL8, defined by  
405 having only one B-Box motif (B-Box 1) in combination with a CCT domain. The expression  
406 patterns shown in Fig. S3 indicate that *BBX14* and *BBX15* respond similarly to *BBX16*. Because  
407 functional redundancy is common among members of the same clade within transcription factor  
408 families (Soy *et al.*, 2014; Pfeiffer *et al.*, 2014; Zhang *et al.*, 2017; Leivar *et al.*, 2020; Martín *et*  
409 *al.*, 2020) this leads us to speculate that BBX14 and BBX15 might share some functional aspects  
410 with BBX16. Redundancy within this clade would imply that the *bbx16* mutant still retains  
411 functionality and, accordingly, we detected more prominent cotyledon phenotypes in *BBX16-OX*  
412 compared to *bbx16*. Future genetic characterization of single and high order mutant combinations  
413 in *bbx14*, *bbx15*, and *bbx16* will shed light on possible functional redundancy and address whether  
414 BBX14 and BBX15 might also play a regulatory role in response to chloroplast damage.  
415 Interestingly, a recent transcriptomic study identified Class III clade as potential players in  
416 response to high light (Huang *et al.*, 2019). Of future interest will be as well to explore whether  
417 the BBX family of transcription factors has functionally evolved and diverged to specialize only  
418 Class III in RS regulation, or whether BBX factors from other clades might also be involved.

#### 419 **The domain-function structure of BBX16, a promoter of photomorphogenesis**

420 The domain structure of BBX proteins has important functional implications. B-Box domains have  
421 been involved in protein-protein interactions and transcriptional regulation, whereas the CCT  
422 harbors a nuclear localization signal (NLS) to mediate nuclear protein transport (Robson *et al.*,  
423 2001), and has also been shown to participate in the association to DNA (Ben-Naim *et al.*, 2006;  
424 Tiwari *et al.*, 2010). CCT-containing BBX proteins include CONSTANTS (BBX1/CO), one of the  
425 best-studied BBX proteins and the founder of the family. In CO, CCT is required to interact with  
426 the E3 ubiquitin ligases COP1 and SPA proteins (Laubinger *et al.*, 2006; Jang *et al.*, 2008),  
427 whereas the B-box1 domain mediates interaction with BBX19 (Wang *et al.*, 2014). In the  
428 regulation of seedling photomorphogenesis, a number of BBX proteins are related to the  
429 COP1/SPA-HY5 regulatory hub (Gangappa & Botto, 2014; Song *et al.*, 2020a; Xu, 2020). Several  
430 of these BBX proteins interact with COP1 and are regulated in a COP1-dependent manner, and/or  
431 regulate HY5 transcription, stability, or activity (Datta *et al.*, 2006; Chang *et al.*, 2011; Holtan *et*  
432 *al.*, 2011; Jiang *et al.*, 2012; Gangappa *et al.*, 2013; Huang *et al.*, 2014; Xu *et al.*, 2016; Wei *et al.*,  
433 2016; Zhang *et al.*, 2017; Job *et al.*, 2018; Lin *et al.*, 2018; Ding *et al.*, 2018; Bursch *et al.*, 2020).  
434 Furthermore, BBX4 has been shown to interact with PIF3 and repress its activity in red light (Heng

435 *et al.*, 2019a), whereas BBX18 and BBX23 have been shown to interact with ELF3 and regulate  
436 thermomorphogenesis in Arabidopsis (Ding *et al.*, 2018). Whether BBX16 is regulated by the  
437 COP/SPA system, and whether BBX16 regulation of cotyledon development downstream of the  
438 GUN1/GLK1 module involves HY5 or other interacting proteins, are matters that await future  
439 research. Interestingly, the CCT domain of BBX16/COL7 has been shown to mediate binding to  
440 the promoter of the auxin biosynthesis repressor *SUR2* in the regulation of plant architecture under  
441 shade conditions in Arabidopsis adult plants (Zhang *et al.*, 2014). In addition, other BBX factors  
442 like BBX20 and BBX32 have been shown to regulate photomorphogenesis through mediating  
443 brassinosteroid and strigolactone homeostasis (Wei *et al.*, 2016; Ravindran *et al.*, 2021). Because  
444 auxin and other hormones are well known key regulators of photomorphogenesis, and integration  
445 of retrograde and hormonal signaling is essential in the adaptation to a myriad of stresses (Jiang &  
446 Dehesh, 2021), it will be of interest in the future to explore a connection of BBX16-mediated  
447 retrograde signaling with key regulatory genes in diverse hormone pathways that could impact  
448 cotyledon development.

449 To conclude, this study supports a model whereby *BBX16* is directly targeted by GLK1 to induce  
450 cotyledon photomorphogenesis under light conditions favorable for seedling deetiolation. In  
451 contrast, when GUN1-mediated RS is activated, the inhibition of *GLK1*, *BBX16* and *PhANG*  
452 expression limits cotyledon and chloroplast development to minimize light damage and optimize  
453 photoprotection. The importance of this response is illustrated by studies with *gun1* seedlings  
454 exposed to high light, which exhibit more photobleached areas in their cotyledons compared to the  
455 WT controls (Ruckle *et al.*, 2007). This adaptive mechanism would protect an etiolated seedling,  
456 which is extremely vulnerable, emerging into excess light such as that in a hot sunny day. This  
457 could take place transiently during establishment, allowing the seedling to prevent damage and  
458 wait safely for the light to become less strong due to shading or the natural shift in the position of  
459 the sun.

## 460 **Acknowledgements**

461 We are grateful to Bin Liu (College of Life Sciences, Hunan University, China) for generously  
462 sharing the *bbx16-1/col7* and *BBX16-OX* lines, to Jane Langdale (University of Oxford) for *GLK1*  
463 lines, and to ABRC/NASC for *bbx16-2* seeds. This work was supported by grants from FEDER /  
464 Ministerio de Ciencia, Innovación y Universidades - Agencia Estatal de Investigación (Project  
465 References BIO2015-68460-P and PGC2018-099987-B-I00) and from the CERCA Programme /



466 Generalitat de Catalunya (Project Reference 2017SGR-718) to E.M. We acknowledge financial  
467 support from the Spanish Ministry of Economy and Competitiveness, through the “Severo Ochoa  
468 Programme for Centres of Excellence in R&D” 2016-2019 (SEV-2015- 0533)”.

#### 469 **Author Contributions**

470 EM, PL, GM and NV conceived the project and planned the experiments. GM and NV performed  
471 experiments and analyzed the data. All authors wrote the manuscript. NV and GM contributed  
472 equally.

#### 473 **Data Availability Statement**

474 The data that support the findings of this study are available from the corresponding author upon  
475 reasonable request.

#### 476 **Figure Legends**

477 **Fig. 1. *BBX16* is a PIF-repressed gene whose expression is induced by light in a *GLK1***  
478 **dependent manner.**

479 **(a, b)** Transcript levels of *BBX16* analysed by qRT-PCR in (a) 3-day-old Col-0, *pifq* and *glk1* and  
480 (b) Col-0, *glk1glk2*, and *GLK1OX* seedlings grown in the dark or in continuous white light (5  
481  $\mu\text{mol}\cdot\text{m}^{-2}\cdot\text{s}^{-1}$ ) as indicated. Values were normalized to *PP2A*, and expression levels are expressed  
482 relative to Col-0 light set at one. Data are the means  $\pm$  SE of biological triplicates ( $n=3$ ) and  
483 asterisks indicate statistically significant differences between each mutant and its respective WT  
484 seedlings (t- test; \*\* $P < 0.01$ , \*\*\* $P < 0.001$ ). n.s.: non significant.

485 **Fig. 2. *BBX16* regulates cotyledon development during early seedling development in**  
486 **continuous light.**

487 **(a)** Boxplot representation of the cotyledon area of *BBX16* loss- (*bbx16*) and gain-of-function  
488 (*BBX16OX1* and *OX2*) mutants grown for three days under continuous white light (5  $\mu\text{mol}\cdot\text{m}^{-2}\cdot\text{s}^{-1}$ ).  
489 **(b)** Visual phenotypes of seedlings grown as detailed in (a). Bar = 2.5 mm **(c)** Boxplot  
490 representation of the hypocotyl length of seedlings grown as detailed in (a). **(d)** Quantification of  
491 the cotyledon angle of 2-day-old dark-grown WT, *bbx16* and two *BBX16* overexpressor lines  
492 transferred to white light (20  $\mu\text{mol}\cdot\text{m}^{-2}\cdot\text{s}^{-1}$ ) for the indicated hours (h). The thick lines and shaded  
493 areas represent the median and the 95% confidence interval of at least 60 seedlings, respectively.  
494 Letters denote the statistically significant differences between genotypes by Kruskal-Wallis test at  
495 each time point ( $P < 0.05$ ). (a and c) Data represent the median of at least 20 seedlings and asterisks

496 indicate statistically significant differences between each mutant and its respective WT seedlings  
497 (Mann–Whitney test; \*P < 0.05, \*\*P < 0.01, \*\*\*P < 0.001).

498 **Fig. 3. Downregulation of *BBX16* mediated by the GUN1-GLK1 module is necessary to**  
499 **repress cotyledon development under photo-damaging conditions.**

500 (a) Transcript levels of *BBX16* from RNA-sequencing of WT Col-0 and *pifq* seedlings grown for  
501 3 days in dark in the absence or presence of lincomycin (Martín *et al.*, 2016). (b, c) Transcript  
502 levels of *BBX16* analyzed by qRT–PCR in 3-day-old light-grown ( $5 \mu\text{mol}\cdot\text{m}^{-2}\cdot\text{s}^{-1}$ ) Col-0 and  
503 *GLK1OX* seedlings (b), and Col-0 and *gun1* seedlings (c), in the absence or presence of lincomycin.  
504 (d) *BBX16* expression levels after 3 h of high light ( $310 \mu\text{mol}\cdot\text{m}^{-2}\cdot\text{s}^{-1}$ ) compared with light ( $130$   
505  $\mu\text{mol}\cdot\text{m}^{-2}\cdot\text{s}^{-1}$ ), in WT and *gun1* mutant seedlings. (b,c,d) Values were normalized to *PP2A*, and  
506 expression levels are expressed relative to Col-0 light (b,c) or Col-0 light 3h (d), set at one. Data  
507 are the means  $\pm$  SE of biological triplicates ( $n=3$ ). (a,b,c,d) Letters denote the statistically  
508 significant differences by Tukey test ( $P<0.05$ ), and asterisks in specific samples indicate  
509 statistically significant differences between each mutant and its respective WT seedlings (t- test;  
510 \*P < 0.05, \*\*P < 0.01). (e) Visual phenotypes (top) and cotyledon angle quantification (of at least  
511 40 seedlings) (bottom) of WT and *BBX16OX* seedlings grown as in (b). Representative seedlings  
512 grown in presence of Lincomycin are shown in the picture. Bar = 2.5 mm. Letters denote the  
513 statistically significant differences among genotypes by Kruskal-Wallis test ( $P<0.05$ ). (f)  
514 Quantification of the cotyledon angle of 2-day-old dark-grown WT Col-0, *gun1*, WT Col-4, *bbx16-*  
515 *1*, and two *BBX16OX* lines transferred to white light ( $10 \mu\text{mol}\cdot\text{m}^{-2}\cdot\text{s}^{-1}$ ) for the indicated times in  
516 the presence of lincomycin. The thick lines and shaded areas represent the median and the 95%  
517 confidence interval of at least 20 seedlings, respectively. Different letters denote statistically  
518 significant differences between genotypes by Kruskal-Wallis test at each time point ( $P<0.05$ ). Linc  
519 = Lincomycin.

520 **Fig. 4. Genetic removal of *BBX16* partially suppresses the *gun1* and *GLK1OX* open cotyledon**  
521 **phenotype in the presence of lincomycin.**

522 (a) Visual phenotypes (left) and quantification of cotyledon angle (right) of 3-day old light-grown  
523 ( $5 \mu\text{mol}\cdot\text{m}^{-2}\cdot\text{s}^{-1}$ ) Col-0, Col-4, *bbx16-1*, *GLK1OX*, and *GLK1OX bbx16-1* seedlings in the presence  
524 or absence of lincomycin. (b) Visual phenotypes (left) and quantification of cotyledon angle (right)  
525 of 2-day old dark-grown WT, *bbx16-1*, *gun1*, and *gun1bbx16-1* seedlings transferred to light ( $10$   
526  $\mu\text{mol}\cdot\text{m}^{-2}\cdot\text{s}^{-1}$ ) for 24 h in the presence or absence of lincomycin. (a,b) Bar = 2.5 mm. Letters denote

527 the statistically significant differences among genotypes by Kruskal-Wallis test ( $P < 0.05$ ), and  
528 asterisks indicate statistically significant differences between each *GLK1OX bbx16-1* mutant and  
529 *GLK1OX* seedlings (Mann-Whitney test; \*\* $P < 0.01$ , \*\*\* $P < 0.001$ ). Linc = Lincomycin.

530 **Fig. 5. GLK1 binds to the *BBX16* promoter.**

531 (a) Schematic representation of the *BBX16* promoter and gene body. GLK1 binding sites  
532 (CCAATC and AGAATCT) (Waters *et al.*, 2009; Franco-Zorrilla *et al.*, 2014) are indicated with  
533 vertical lines in the promoter, and the regions recognized by primer pairs P1, P2 and P3 used in  
534 the ChIP-qPCR are underlined (Table S2). (b) GLK1 binding to the *BBX16* promoter in 3-day-old  
535 white-light ( $5 \mu\text{mol}\cdot\text{m}^{-2}\cdot\text{s}^{-1}$ ) grown Col-0 and *GLK1OX-GFP* seedlings. Data for *GLK1OX-GFP*  
536 correspond to three independent ChIP experiments and error bars indicate the SE. Col-0 controls  
537 correspond to one biological replicate. Letters denote the statistically significant differences  
538 among *GLK1OX-GFP* samples by Tukey's test ( $P < 0.05$ ). Ab, samples immunoprecipitated with  
539 antibody; No Ab, control samples immunoprecipitated without antibody.

540 **Fig. 6. *BBX16* regulation of *PhANG* genes in response to lincomycin.**

541 Expression of *LHCB2.2*, *LHCB1.4*, *RBCS3B*, *RBCS1A*, and *CA1* was analyzed by quantitative RT-  
542 PCR in WT, *bbx16*, *BBX16OX*, *gun1*, *GLK1OX*, and *GLK1OXbbx16* seedlings grown for 3 days  
543 (3d) in white light ( $5 \mu\text{mol}\cdot\text{m}^{-2}\cdot\text{s}^{-1}$ ) in the absence or presence of lincomycin. Expression levels  
544 relative to Col-0 light are shown. Data are the means  $\pm$  SE of biological triplicates. Letters denote  
545 the statistically significant differences among genotypes by Tukey's test at each condition ( $P < 0.05$ ).  
546 Linc = Lincomycin.

547 **Fig. 7. The GUN1-GLK1 module regulates *BBX16* expression during retrograde signaling.**

548 Downstream branching of GLK1 signaling directly induces two independent transcriptional  
549 pathways to regulate expression of (1) photosynthesis-associated nuclear genes (*PhANGs*) such as  
550 *LHCB2.2* and *LHCB1.4*, and (2) *BBX16* to implement cotyledon development, and indirect  
551 regulation of *PhANGs* such as *CA1*, *RBCS1A*, and *RBCS3B*, possibly with involvement of other  
552 factors (denoted as ?). In the dark, PIFs bind to the *GLK1* promoter to directly repress *GLK1*  
553 expression. In response to normal light, activated phytochromes (phys) release PIF repression on  
554 *GLK1* promoter, which triggers *GLK1* transcription. If chloroplast integrity is disrupted by  
555 lincomycin or high light, retrograde signals emitted by dysfunctional chloroplast induce GUN1-  
556 mediated repression of *GLK1* expression by a yet unknown mechanism, preventing *BBX16* and  
557 *PhANGs* transcription to block the progression of photomorphogenesis.

558

559 **References**

560 **Arsovski AA, Galstyan A, Guseman JM, Nemhauser JL. 2012.** Photomorphogenesis. *The*  
561 *Arabidopsis Book* **10**: e0147–e0147.

562 **Ben-Naim O, Eshed R, Parnis A, Teper-Bamnolker P, Shalit A, Coupland G, Samach A,**  
563 **Lifschitz E. 2006.** The CCAAT binding factor can mediate interactions between CONSTANS-  
564 like proteins and DNA. *The Plant Journal* **46**: 462–476.

565 **Bursch K, Toledo-Ortiz G, Pireyre M, Lohr M, Braatz C, Johansson H. 2020.** Identification  
566 of BBX proteins as rate-limiting cofactors of HY5. *Nature Plants* **2020 6:8 6**: 921–928.

567 **Castillon A, Shen H, Huq E. 2007.** Phytochrome Interacting Factors: central players in  
568 phytochrome-mediated light signaling networks. *Trends in Plant Science* **12**: 514–521.

569 **Chan KX, Phua SY, Crisp P, McQuinn R, Pogson BJ. 2016.** Learning the Languages of the  
570 Chloroplast: Retrograde Signaling and Beyond. *Annual Review of Plant Biology* **67**: 25–53.

571 **Chang CJ, Li Y-H, Chen L-T, Chen W-C, Hsieh W-P, Shin J, Jane W-N, Chou S-J, Choi G,**  
572 **Hu J-M, et al. 2008.** LZFI, a HY5-regulated transcriptional factor, functions in Arabidopsis de-  
573 etiolation. *The Plant Journal* **54**: 205–219.

574 **Chang C-SJ, Maloof JN, Wu S-H. 2011.** COP1-mediated degradation of BBX22/LZF1  
575 optimizes seedling development in Arabidopsis. *Plant Physiology* **156**: 228–239.

576 **Chen M, Ji M, Wen B, Liu L, Li S, Chen X, Gao D, Li L. 2016.** GOLDEN 2-LIKE Transcription  
577 Factors of Plants . *Frontiers in Plant Science* **7** : 1509.

578 **Colombo M, Tadini L, Peracchio C, Ferrari R, Pesaresi P. 2016.** GUN1, a Jack-Of-All-Trades  
579 in Chloroplast Protein Homeostasis and Signaling. *Frontiers in Plant Science* **0**: 1427.

580 **Datta S, Hettiarachchi GHCM, Deng X-W, Holm M. 2006.** Arabidopsis CONSTANS-LIKE3  
581 Is a Positive Regulator of Red Light Signaling and Root Growth. *The Plant Cell* **18**: 70 LP – 84.

582 **Datta S, Hettiarachchi C, Johansson H, Holm M. 2007.** SALT TOLERANCE HOMOLOG2, a  
583 B-box protein in Arabidopsis that activates transcription and positively regulates light-mediated  
584 development. *The Plant Cell* **19**: 3242–3255.

585 **Datta S, Johansson H, Hettiarachchi C, Irigoyen ML, Desai M, Rubio V, Holm M. 2008.**  
586 LZFI/SALT TOLERANCE HOMOLOG3, an Arabidopsis B-box protein involved in light-  
587 dependent development and gene expression, undergoes COP1-mediated ubiquitination. *The Plant*  
588 *Cell* **20**: 2324–2338.

589 **Ding L, Wang S, Song Z-T, Jiang Y, Han J-J, Lu S-J, Li L, Liu J-X. 2018.** Two B-Box Domain  
590 Proteins, BBX18 and BBX23, Interact with ELF3 and Regulate Thermomorphogenesis in  
591 Arabidopsis. *Cell Reports* **25**: 1718–1728.e4.

592 **Estavillo GM, Crisp PA, Pornsiriwong W, Wirtz M, Collinge D, Carrie C, Giraud E, Whelan  
593 J, David P, Javot H, et al. 2011.** Evidence for a SAL1-PAP chloroplast retrograde pathway that  
594 functions in drought and high light signaling in Arabidopsis. *The Plant Cell* **23**: 3992–4012.

595 **Fan X-Y, Sun Y, Cao D-M, Bai M-Y, Luo X-M, Yang H-J, Wei C-Q, Zhu S-W, Sun Y, Chong  
596 K, et al. 2012.** BZS1, a B-box protein, promotes photomorphogenesis downstream of both  
597 brassinosteroid and light signaling pathways. *Molecular Plant* **5**: 591–600.

598 **Fitter DW, Martin DJ, Copley MJ, Scotland RW, Langdale JA. 2002.** GLK gene pairs regulate  
599 chloroplast development in diverse plant species. *The Plant Journal* **31**: 713–727.

600 **Franco-Zorrilla JM, López-Vidriero I, Carrasco JL, Godoy M, Vera P, Solano R. 2014.**  
601 DNA-binding specificities of plant transcription factors and their potential to define target genes.  
602 *Proceedings of the National Academy of Sciences* **111**: 2367–2372.

603 **Galvão VC, Fankhauser C. 2015.** Sensing the light environment in plants: photoreceptors and  
604 early signaling steps. *Current Opinion in Neurobiology* **34**: 46–53.

605 **Gangappa SN, Botto JF. 2014.** The BBX family of plant transcription factors. *Trends in Plant  
606 Science* **19**: 460–470.

607 **Gangappa SN, Crocco CD, Johansson H, Datta S, Hettiarachchi C, Holm M, Botto JF. 2013.**  
608 The Arabidopsis B-BOX Protein BBX25 Interacts with HY5, Negatively Regulating BBX22  
609 Expression to Suppress Seedling Photomorphogenesis. *The Plant Cell* **25**: 1243 – 1257.

610 **Gommers CMM, Monte E. 2018.** Seedling Establishment: A Dimmer Switch-Regulated Process  
611 between Dark and Light Signaling. *Plant Physiology* **176**: 1061–1074.

612 **Heng Y, Jiang Y, Zhao X, Zhou H, Wang X, Deng XW, Xu D. 2019a.** BBX4, a phyB-interacting  
613 and modulated regulator, directly interacts with PIF3 to fine tune red light-mediated  
614 photomorphogenesis. *Proceedings of the National Academy of Sciences* **116**: 26049–26056.

615 **Heng Y, Lin F, Jiang Y, Ding M, Yan T, Lan H, Zhou H, Zhao X, Xu D, Deng XW. 2019b.**  
616 B-Box Containing Proteins BBX30 and BBX31, Acting Downstream of HY5, Negatively  
617 Regulate Photomorphogenesis in Arabidopsis. *Plant Physiology* **180**: 497–508.

- 618 **Hills AC, Khan S, López-Juez E. 2015.** Chloroplast Biogenesis-Associated Nuclear Genes:  
619 Control by Plastid Signals Evolved Prior to Their Regulation as Part of Photomorphogenesis.  
620 *Frontiers in Plant Science* **6**: 1078.
- 621 **Hoecker U. 2017.** The activities of the E3 ubiquitin ligase COP1/SPA, a key repressor in light  
622 signaling. *Current Opinion in Plant Biology* **37**: 63–69.
- 623 **Holtan HE, Bandong S, Marion CM, Adam L, Tiwari S, Shen Y, Maloof JN, Maszle DR,**  
624 **Ohto M, Preuss S, et al. 2011.** BBX32, an Arabidopsis B-Box Protein, Functions in Light  
625 Signaling by Suppressing HY5-Regulated Gene Expression and Interacting with STH2/BBX21.  
626 *Plant Physiology* **156**: 2109–2123.
- 627 **Huang X, Ouyang X, Deng XW. 2014.** Beyond repression of photomorphogenesis: role  
628 switching of COP/DET/FUS in light signaling. *Current Opinion in Plant Biology* **21**: 96–103.
- 629 **Huang J, Zhao X, Chory J. 2019.** The Arabidopsis Transcriptome Responds Specifically and  
630 Dynamically to High Light Stress. *Cell Reports* **29**: 4186–4199.e3.
- 631 **Indorf M, Cordero J, Neuhaus G, Rodríguez-Franco M. 2007.** Salt tolerance (STO), a stress-  
632 related protein, has a major role in light signalling. *The Plant Journal* **51**: 563–574.
- 633 **Jang S, Marchal V, Panigrahi KCS, Wenkel S, Soppe W, Deng X-W, Valverde F, Coupland**  
634 **G. 2008.** Arabidopsis COP1 shapes the temporal pattern of CO accumulation conferring a  
635 photoperiodic flowering response. *The EMBO journal* **27**: 1277–1288.
- 636 **Jarvis P, López-Juez E. 2014.** Biogenesis and homeostasis of chloroplasts and other plastids.  
637 *Nature Reviews Molecular Cell Biology* **15**: 147.
- 638 **Jiang J, Dehesh K. 2021.** Plastidial retrograde modulation of light and hormonal signaling: an  
639 odyssey. *New Phytologist* **230**: 931–937.
- 640 **Jiang L, Wang Y, Li Q-F, Björn LO, He J-X, Li S-S. 2012.** Arabidopsis STO/BBX24 negatively  
641 regulates UV-B signaling by interacting with COP1 and repressing HY5 transcriptional activity.  
642 *Cell Research* **22**: 1046–1057.
- 643 **Jiao Y, Ma L, Strickland E, Deng XW. 2005.** Conservation and divergence of light-regulated  
644 genome expression patterns during seedling development in rice and Arabidopsis. *The Plant Cell*  
645 **17**: 3239–3256.
- 646 **Jing Y, Lin R. 2020.** Transcriptional regulatory network of the light signaling pathways. *New*  
647 *Phytologist* **227**: 683–697.

- 648 **Job N, Datta S. 2021.** PIF3/HY5 module regulates BBX11 to suppress protochlorophyllide levels  
649 in dark and promote photomorphogenesis in light. *New Phytologist* **230**: 190–204.
- 650 **Job N, Yadukrishnan P, Bursch K, Datta S, Johansson H. 2018.** Two B-box proteins regulate  
651 photomorphogenesis by oppositely modulating HY5 through their diverse C-terminal domains.  
652 *Plant Physiology* **176**: 2963-2976.
- 653 **Jung H-S, Chory J. 2010.** Signaling between chloroplasts and the nucleus: can a systems biology  
654 approach bring clarity to a complex and highly regulated pathway? *Plant Physiology* **152**: 453–  
655 459.
- 656 **Khanna R, Kronmiller B, Maszle DR, Coupland G, Holm M, Mizuno T, Wu S-H. 2009.** The  
657 Arabidopsis B-Box Zinc Finger Family. *The Plant Cell* **21**: 3416 – 3420.
- 658 **Khanna R, Shen Y, Marion CM, Tsuchisaka A, Theologis A, Schäfer E, Quail PH. 2007.** The  
659 basic helix-loop-helix transcription factor PIF5 acts on ethylene biosynthesis and phytochrome  
660 signaling by distinct mechanisms. *The Plant Cell* **19**: 3915–3929.
- 661 **Khanna R, Shen Y, Toledo-Ortiz G, Kikis EA, Johannesson H, Hwang Y-S, Quail PH. 2006.**  
662 Functional Profiling Reveals That Only a Small Number of Phytochrome-Regulated Early-  
663 Response Genes in Arabidopsis Are Necessary for Optimal Deetiolation. *The Plant Cell* **18**: 2157  
664 – 2171.
- 665 **Kindgren P, Kremnev D, Blanco NE, de Dios Barajas López J, Fernández AP, Tellgren-Roth  
666 C, Small I, Strand Å. 2012.** The plastid redox insensitive 2 mutant of Arabidopsis is impaired  
667 in PEP activity and high light-dependent plastid redox signalling to the nucleus. *The Plant Journal*  
668 **70**: 279–291.
- 669 **Kleine T, Maier UG, Leister D. 2009.** DNA Transfer from Organelles to the Nucleus: The  
670 Idiosyncratic Genetics of Endosymbiosis. *Annual Review of Plant Biology* **60**: 115–138.
- 671 **Koussevitzky S, Nott A, Mockler TC, Hong F, Sachetto-Martins G, Surpin M, Lim J, Mittler  
672 R, Chory J. 2007.** Signals from chloroplasts converge to regulate nuclear gene expression. *Science*  
673 **316**: 715–9.
- 674 **Kumagai T, Ito S, Nakamichi N, Niwa Y, Murakami M, Yamashino T, Mizuno T. 2008.** The  
675 Common Function of a Novel Subfamily of B-Box Zinc Finger Proteins with Reference to  
676 Circadian-Associated Events in Arabidopsis thaliana. *Bioscience, Biotechnology, and*  
677 *Biochemistry* **72**: 1539–1549.

- 678 **Lau OS, Deng XW. 2012.** The photomorphogenic repressors COP1 and DET1: 20 years later.  
679 *Trends in Plant Science* **17**: 584–593.
- 680 **Laubinger S, Marchal V, Gentilhomme J, Wenkel S, Adrian J, Jang S, Kulajta C, Braun H,**  
681 **Coupland G, Hoecker U. 2006.** Arabidopsis SPA proteins regulate photoperiodic flowering and  
682 interact with the floral inducer CONSTANS to regulate its stability. *Development* **133**: 3213 –  
683 3222.
- 684 **Leivar P, Martín G, Soy J, Dalton-Roesler J, Quail PH, Monte E. 2020.** Phytochrome-imposed  
685 inhibition of PIF7 activity shapes photoperiodic growth in Arabidopsis together with PIF1, 3, 4  
686 and 5. *Physiologia Plantarum* **169**: 452–466.
- 687 **Leivar P, Monte E. 2014.** PIFs: Systems Integrators in Plant Development. *The Plant Cell* **26**:  
688 56–78.
- 689 **Leivar P, Monte E, Oka Y, Liu T, Carle C, Castillon A, Huq E, Quail PH. 2008.** Multiple  
690 Phytochrome-Interacting bHLH Transcription Factors Repress Premature Seedling  
691 Photomorphogenesis in Darkness. *Current Biology* **18**: 1815–1823.
- 692 **Leivar P, Quail PH. 2011.** PIFs: pivotal components in a cellular signaling hub. *Trends in Plant*  
693 *Science* **16**: 19–28.
- 694 **Leivar P, Tepperman JM, Monte E, Calderon RH, Liu TL, Quail PH. 2009.** Definition of  
695 early transcriptional circuitry involved in light-induced reversal of PIF-imposed repression of  
696 photomorphogenesis in young Arabidopsis seedlings. *The Plant cell* **21**: 3535–53.
- 697 **Li H, Chiu C-C. 2010.** Protein Transport into Chloroplasts. *Annual Review of Plant Biology* **61**:  
698 157–180.
- 699 **Li Y, Shi Y, Li M, Fu D, Wu S, Li J, Gong Z, Liu H, Yang S. 2021.** The CRY2–COP1–HY5–  
700 BBX7/8 module regulates blue light-dependent cold acclimation in Arabidopsis. *The Plant Cell*  
701 **33**: 3555–3573.
- 702 **Lin F, Jiang Y, Li J, Yan T, Fan L, Liang J, Chen ZJ, Xu D, Deng XW. 2018.** B-BOX  
703 DOMAIN PROTEIN28 Negatively Regulates Photomorphogenesis by Repressing the Activity of  
704 Transcription Factor HY5 and Undergoes COP1-Mediated Degradation. *The Plant Cell* **30**: 2006–  
705 2019.
- 706 **Lyu G, Li D, Li S. 2020.** Bioinformatics analysis of BBX family genes and its response to UV-B  
707 in Arabidopsis thaliana. *Plant Signaling & Behavior* **15**.



- 708 **Ma L, Li J, Qu L, Hager J, Chen Z, Zhao H, Deng XW. 2001.** Light control of Arabidopsis  
709 development entails coordinated regulation of genome expression and cellular pathways. *The*  
710 *Plant Cell* **13**: 2589–2607.
- 711 **Marino G, Naranjo B, Wang J, Penzler J-F, Kleine T, Leister D. 2019.** Relationship of GUN1  
712 to FUG1 in chloroplast protein homeostasis. *The Plant Journal* **99**: 521–535.
- 713 **Martín G, Leivar P, Ludevid D, Tepperman JM, Quail PH, Monte E. 2016.** Phytochrome and  
714 retrograde signalling pathways converge to antagonistically regulate a light-induced  
715 transcriptional network. *Nature Communications* **7**: 11431.
- 716 **Martín G, Rovira A, Veciana N, Soy J, Toledo-Ortiz G, Gommers CMM, Boix M, Henriques**  
717 **R, Minguet EG, Alabadí D, et al. 2018.** Circadian Waves of Transcriptional Repression Shape  
718 PIF-Regulated Photoperiod-Responsive Growth in Arabidopsis. *Current Biology* **28**: 311–318.e5.
- 719 **Martín G, Veciana N, Boix M, Rovira A, Henriques R, Monte E. 2020.** The photoperiodic  
720 response of hypocotyl elongation involves regulation of CDF1 and CDF5 activity. *Physiologia*  
721 *Plantarum* **169**: 480–490.
- 722 **Nagaoka S, Takano T. 2003.** Salt tolerance-related protein STO binds to a Myb transcription  
723 factor homologue and confers salt tolerance in Arabidopsis. *Journal of Experimental Botany* **54**:  
724 2231–2237.
- 725 **Oelmüller R, Levitan I, Bergfeld R, Rajasekhar VK, Mohr H. 1986.** Expression of nuclear  
726 genes as affected by treatments acting on the plastids. *Planta* **168**: 482–492.
- 727 **Oh S, Montgomery BL. 2014.** Phytochrome-dependent coordinate control of distinct aspects of  
728 nuclear and plastid gene expression during anterograde signaling and photomorphogenesis.  
729 *Frontiers in Plant Science* **5**: 171.
- 730 **Pesaresi P, Kim C. 2019.** Current understanding of GUN1: a key mediator involved in biogenic  
731 retrograde signaling. *Plant Cell Reports* **38**: 819–823.
- 732 **Pfeiffer A, Shi H, Tepperman JM, Zhang Y, Quail PH. 2014.** Combinatorial Complexity in a  
733 Transcriptionally Centered Signaling Hub in Arabidopsis. *Molecular Plant* **7**: 1598–1618.
- 734 **Pham VN, Xu X, Huq E. 2018.** Molecular bases for the constitutive photomorphogenic  
735 phenotypes in Arabidopsis. *Development* **145**: dev169870.
- 736 **Ravindran N, Ramachandran H, Job N, Yadav A, Vaishak KP, Datta S. 2021.** B-box protein  
737 BBX32 integrates light and brassinosteroid signals to inhibit cotyledon opening. *Plant Physiology*  
738 **187**: 446–461.

739 **Robson F, Costa MMR, Hepworth SR, Vizir I, Pinheiro M, Reeves PH, Putterill J, Coupland**  
740 **G. 2001.** Functional importance of conserved domains in the flowering-time gene *CONSTANS*  
741 demonstrated by analysis of mutant alleles and transgenic plants. *The Plant Journal* **28**: 619–631.  
742 **Ruckle ME, DeMarco SM, Larkin RM. 2007.** Plastid signals remodel light signaling networks  
743 and are essential for efficient chloroplast biogenesis in *Arabidopsis*. *The Plant Cell* **19**: 3944–3960.  
744 **Sentandreu M, Martín G, González-Schain N, Leivar P, Soy J, Tepperman JM, Quail PH,**  
745 **Monte E. 2011.** Functional Profiling Identifies Genes Involved in Organ-Specific Branches of the  
746 PIF3 Regulatory Network in *Arabidopsis*. *The Plant Cell* **23**: 3974–3991.  
747 **Shi H, Lyu M, Luo Y, Liu S, Li Y, He H, Wei N, Deng XW, Zhong S. 2018.** Genome-wide  
748 regulation of light-controlled seedling morphogenesis by three families of transcription factors.  
749 *Proceedings of the National Academy of Sciences* **115**: 6482 – 6487.  
750 **Shimizu T, Kacprzak SM, Mochizuki N, Nagatani A, Watanabe S, Shimada T, Tanaka K,**  
751 **Hayashi Y, Arai M, Leister D, et al. 2019.** The retrograde signaling protein GUN1 regulates  
752 tetrapyrrole biosynthesis. *Proceedings of the National Academy of Sciences* **116**: 24900–24906.  
753 **Shin J, Kim K, Kang H, Zulfugarov IS, Bae G, Lee C-H, Lee D, Choi G. 2009.** Phytochromes  
754 promote seedling light responses by inhibiting four negatively-acting phytochrome-interacting  
755 factors. *Proceedings of the National Academy of Sciences* **106**: 7660–7665.  
756 **Shin J, Park E, Choi G. 2007.** PIF3 regulates anthocyanin biosynthesis in an HY5-dependent  
757 manner with both factors directly binding anthocyanin biosynthetic gene promoters in *Arabidopsis*.  
758 *The Plant Journal* **49**: 981–994.  
759 **Song Z, Bian Y, Liu J, Sun Y, Xu D. 2020a.** B-box proteins: Pivotal players in light-mediated  
760 development in plants. *Journal of Integrative Plant Biology* **62**: 1293–1309.  
761 **Song Z, Yan T, Liu J, Bian Y, Heng Y, Lin F, Jiang Y, Deng XW, Xu D. 2020b.**  
762 BBX28/BBX29, HY5 and BBX30/31 form a feedback loop to fine-tune photomorphogenic  
763 development. *The Plant Journal* **104**: 377–390.  
764 **Soy J, Leivar P, Monte E. 2014.** PIF1 promotes phytochrome-regulated growth under  
765 photoperiodic conditions in *Arabidopsis* together with PIF3, PIF4, and PIF5. *Journal of*  
766 *Experimental Botany* **65**: 2925–2936.  
767 **Su L, Hou P, Song M, Zheng X, Guo L, Xiao Y, Yan L, Li W, Yang J. 2015.** Synergistic and  
768 Antagonistic Action of Phytochrome (Phy) A and PhyB during Seedling De-Etiolation in  
769 *Arabidopsis thaliana*. *International Journal of Molecular Sciences* **16**: 12199–212.

770 **Sullivan JA, Gray JC. 1999.** Plastid translation is required for the expression of nuclear  
771 photosynthesis genes in the dark and in roots of the pea *lip1* mutant. *The Plant Cell* **11**: 901–910.

772 **Tadini L, Peracchio C, Trotta A, Colombo M, Mancini I, Jeran N, Costa A, Faoro F, Marsoni**  
773 **M, Vannini C, et al. 2020.** GUN1 influences the accumulation of NEP-dependent transcripts and  
774 chloroplast protein import in Arabidopsis cotyledons upon perturbation of chloroplast protein  
775 homeostasis. *The Plant Journal* **101**: 1198–1220.

776 **Tadini L, Pesaresi P, Kleine T, Rossi F, Guljamow A, Sommer F, Mühlhaus T, Schroda M,**  
777 **Masiero S, Pribil M, et al. 2016.** GUN1 Controls Accumulation of the Plastid Ribosomal Protein  
778 S1 at the Protein Level and Interacts with Proteins Involved in Plastid Protein Homeostasis. *Plant*  
779 *Physiology* **170**: 1817–1830.

780 **Tiwari SB, Shen Y, Chang H-C, Hou Y, Harris A, Ma SF, McPartland M, Hymus GJ, Adam**  
781 **L, Marion C, et al. 2010.** The flowering time regulator CONSTANS is recruited to the  
782 FLOWERING LOCUS T promoter via a unique cis-element. *New Phytologist* **187**: 57–66.

783 **Toledo-Ortiz G, Huq E, Quail PH. 2003.** The Arabidopsis basic/helix-loop-helix transcription  
784 factor family. *The Plant Cell* **15**: 1749–1770.

785 **Wang C-Q, Guthrie C, Sarmast MK, Dehesh K. 2014.** BBX19 interacts with CONSTANS to  
786 repress FLOWERING LOCUS T transcription, defining a flowering time checkpoint in  
787 Arabidopsis. *The Plant Cell* **26**: 3589–3602.

788 **Wang C-Q, Sarmast MK, Jiang J, Dehesh K. 2015.** The Transcriptional Regulator BBX19  
789 Promotes Hypocotyl Growth by Facilitating COP1-Mediated EARLY FLOWERING3  
790 Degradation in Arabidopsis. *The Plant Cell* **27**: 1128–1139.

791 **Wang Q, Tu X, Zhang J, Chen X, Rao L. 2013a.** Heat stress-induced BBX18 negatively  
792 regulates the thermotolerance in Arabidopsis. *Molecular Biology Reports* **40**: 2679–2688.

793 **Wang Q, Zeng J, Deng K, Tu X, Zhao X, Tang D, Liu X. 2011.** DBB1a, involved in gibberellin  
794 homeostasis, functions as a negative regulator of blue light-mediated hypocotyl elongation in  
795 Arabidopsis. *Planta* **233**: 13–23.

796 **Wang H, Zhang Z, Li H, Zhao X, Liu X, Ortiz M, Lin C, Liu B. 2013b.** CONSTANS-LIKE 7  
797 regulates branching and shade avoidance response in Arabidopsis. *Journal of Experimental Botany*  
798 **64**: 1017–1024.

799 **Waters MT, Moylan EC, Langdale JA. 2008.** GLK transcription factors regulate chloroplast  
800 development in a cell-autonomous manner. *The Plant Journal* **56**: 432–444.

- 801 **Waters MT, Wang P, Korkaric M, Capper RG, Saunders NJ, Langdale JA. 2009.** GLK  
802 transcription factors coordinate expression of the photosynthetic apparatus in Arabidopsis. *The*  
803 *Plant Cell* **21**: 1109–1128.
- 804 **Wei C-Q, Chien C-W, Ai L-F, Zhao J, Zhang Z, Li KH, Burlingame AL, Sun Y, Wang Z-Y.**  
805 **2016.** The Arabidopsis B-box protein BZS1/BBX20 interacts with HY5 and mediates strigolactone  
806 regulation of photomorphogenesis. *Journal of Genetics and Genomics* **43**: 555–563.
- 807 **Wu G-Z, Bock R. 2021.** GUN control in retrograde signaling: How GENOMES UNCOUPLED  
808 proteins adjust nuclear gene expression to plastid biogenesis. *The Plant Cell* **33**: 457–474.
- 809 **Wu G-Z, Chalvin C, Hoelscher M, Meyer EH, Wu XN, Bock R. 2018.** Control of Retrograde  
810 Signaling by Rapid Turnover of GENOMES UNCOUPLED1. *Plant Physiology* **176**: 2472–2495.
- 811 **Wu G-Z, Meyer EH, Richter AS, Schuster M, Ling Q, Schöttler MA, Walther D, Zoschke R,**  
812 **Grimm B, Jarvis RP, et al. 2019.** Control of retrograde signalling by protein import and cytosolic  
813 folding stress. *Nature Plants* **2019 5:5 5**: 525–538.
- 814 **Xiao Y, Savchenko T, Baidoo EEK, Chehab WE, Hayden DM, Tolstikov V, Corwin JA,**  
815 **Kliebenstein DJ, Keasling JD, Dehesh K. 2012.** Retrograde Signaling by the Plastidial  
816 Metabolite MEcPP Regulates Expression of Nuclear Stress-Response Genes. *Cell* **149**: 1525–1535.
- 817 **Xu D. 2020.** COP1 and BBXs-HY5-mediated light signal transduction in plants. *New Phytologist*  
818 **228**: 1748–1753.
- 819 **Xu D, Jiang Y, Li J, Holm M, Deng XW. 2018.** The B-Box Domain Protein BBX21 Promotes  
820 Photomorphogenesis. *Plant Physiology* **176**: 2365 – 2375.
- 821 **Xu D, Jiang Y, Li J, Lin F, Holm M, Deng XW. 2016.** BBX21, an Arabidopsis B-box protein,  
822 directly activates HY5 and is targeted by COP1 for 26S proteasome-mediated degradation.  
823 *Proceedings of the National Academy of Sciences of the United States of America* **113**: 7655–7660.
- 824 **Xu X, Paik I, Zhu L, Huq E. 2015.** Illuminating Progress in Phytochrome-Mediated Light  
825 Signaling Pathways. *Trends in Plant Science* **20**: 641–650.
- 826 **Yi C, Deng XW. 2005.** COP1 – from plant photomorphogenesis to mammalian tumorigenesis.  
827 *Trends in Cell Biology* **15**: 618–625.
- 828 **Zhang X, Huai J, Shang F, Xu G, Tang W, Jing Y, Lin R. 2017a.** A PIF1/PIF3-HY5-BBX23  
829 Transcription Factor Cascade Affects Photomorphogenesis. *Plant Physiology* **174**: 2487–2500.

830 **Zhang Z, Ji R, Li H, Zhao T, Liu J, Lin C, Liu B. 2014.** CONSTANS-LIKE 7 (COL7) Is  
831 Involved in Phytochrome B (phyB)-Mediated Light-Quality Regulation of Auxin Homeostasis.  
832 *Molecular Plant* **7**: 1429–1440.

833 **Zhang Y, Mayba O, Pfeiffer A, Shi H, Tepperman JM, Speed TP, Quail PH. 2013.** A Quartet  
834 of PIF bHLH Factors Provides a Transcriptionally Centered Signaling Hub That Regulates  
835 Seedling Morphogenesis through Differential Expression-Patterning of Shared Target Genes in  
836 Arabidopsis. *PLOS Genetics* **9**: e1003244.

837 **Zhao X, Huang J, Chory J. 2019.** GUN1 interacts with MORF2 to regulate plastid RNA editing  
838 during retrograde signaling. *Proceedings of the National Academy of Sciences* **116**: 10162–10167.

839 **Zubo YO, Blakley IC, Franco-Zorrilla JM, Yamburenko M V, Solano R, Kieber JJ, Loraine  
840 AE, Schaller GE. 2018.** Coordination of Chloroplast Development through the Action of the GNC  
841 and GLK Transcription Factor Families. *Plant Physiology* **178**: 130–147.

842

#### 843 **Supporting Information**

844 **Fig. S1.** Model depicting the criteria we followed to identify putative regulators of cotyledon  
845 development downstream of GLK1.

846 **Fig. S2.** Molecular characterization of *bbx16-2*.

847 **Fig. S3.** *BBX14*, *BBX15* and *BBX16* are similarly regulated by PIFs and GLK1 in dark and light.

848 **Table S1.** List of primers used for genotyping.

849 **Table S2.** List of primers used for qRT-PCR.

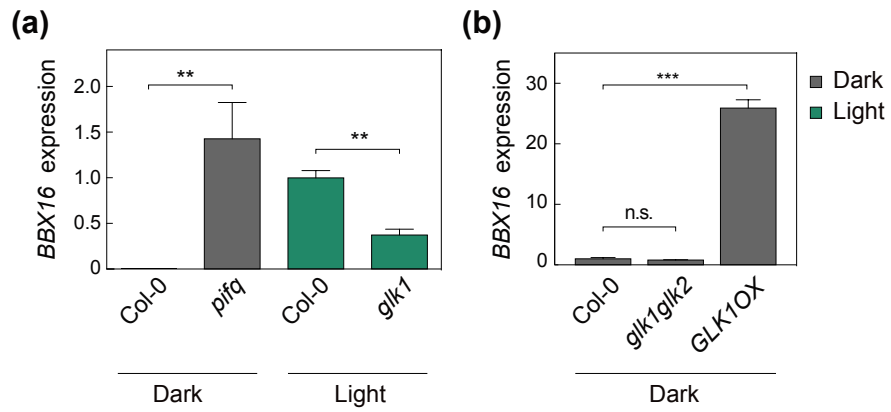

Figure 1

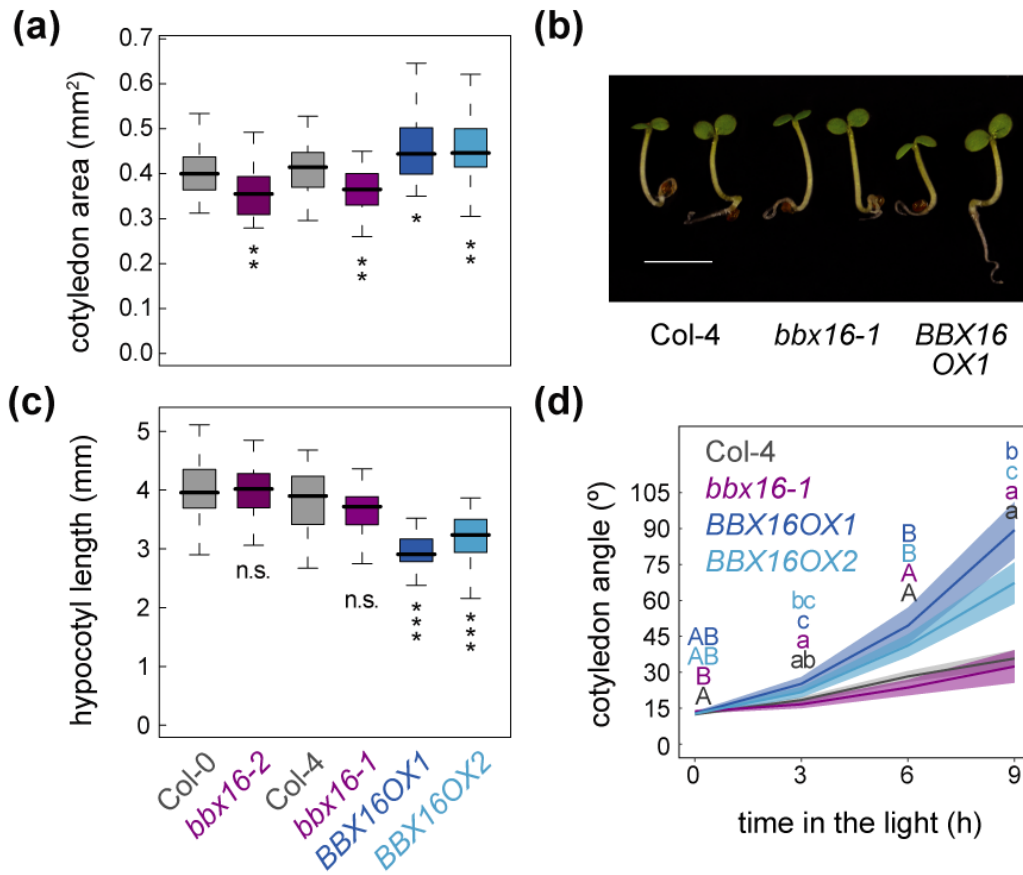

Figure 2

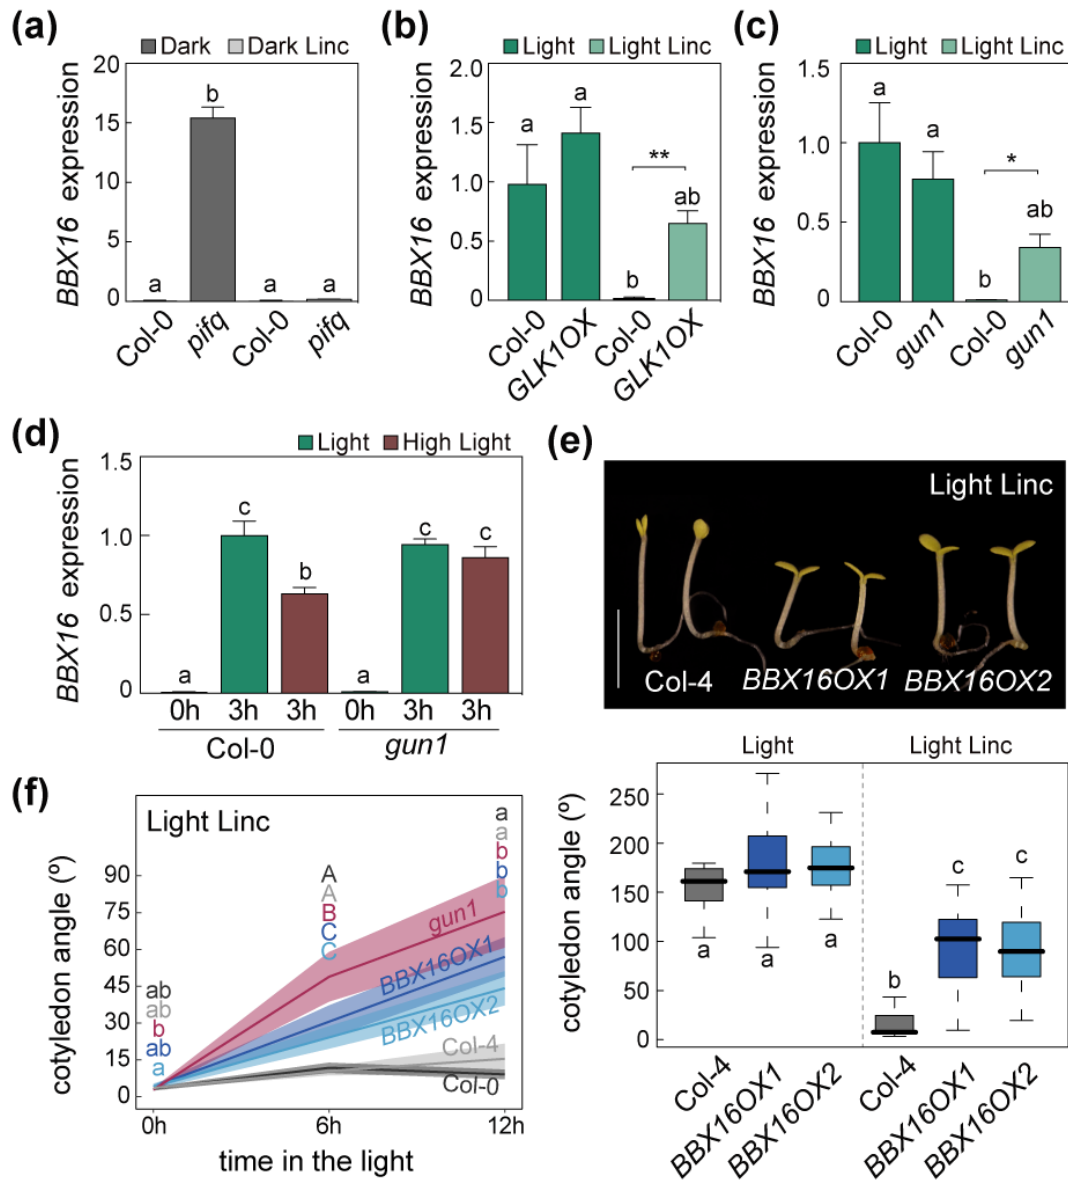

Figure 3



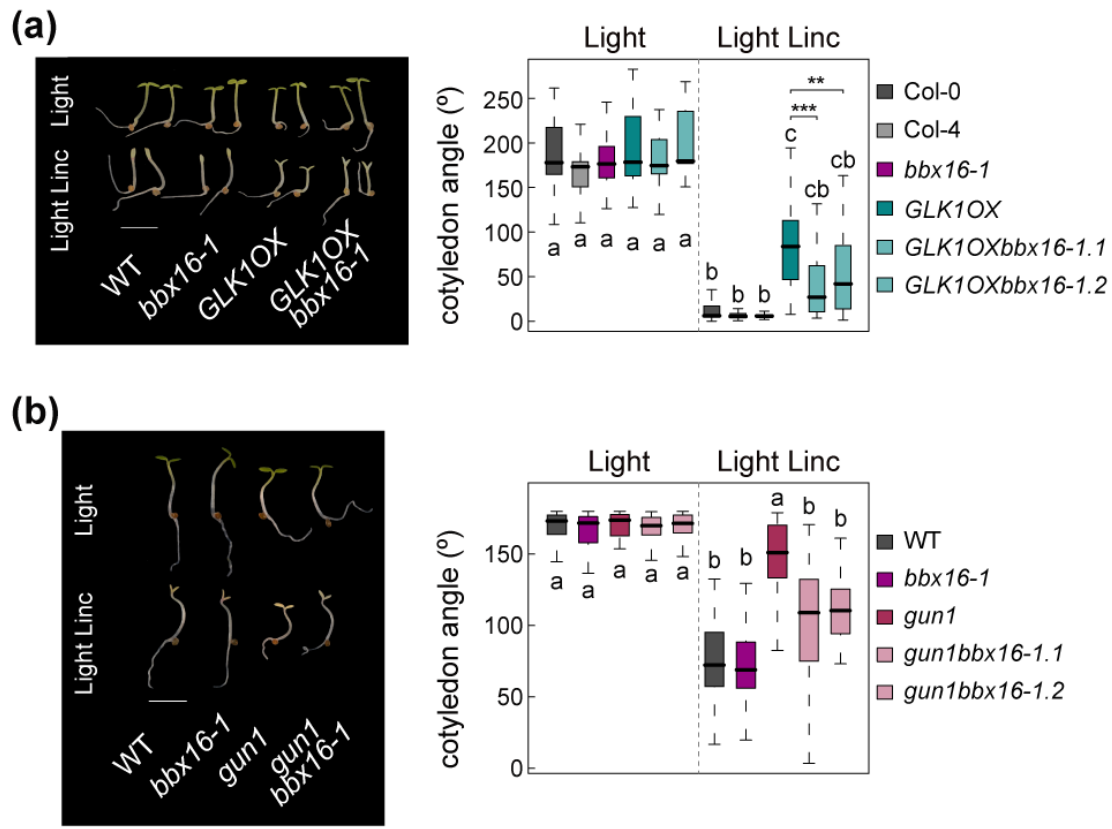

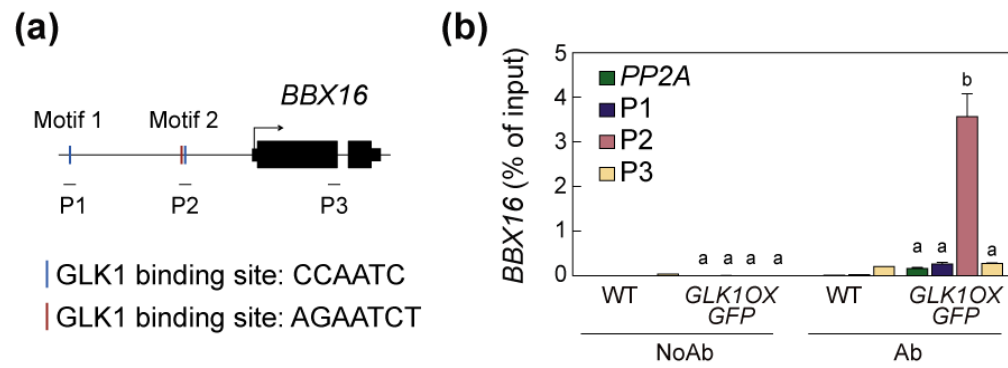

Figure 5

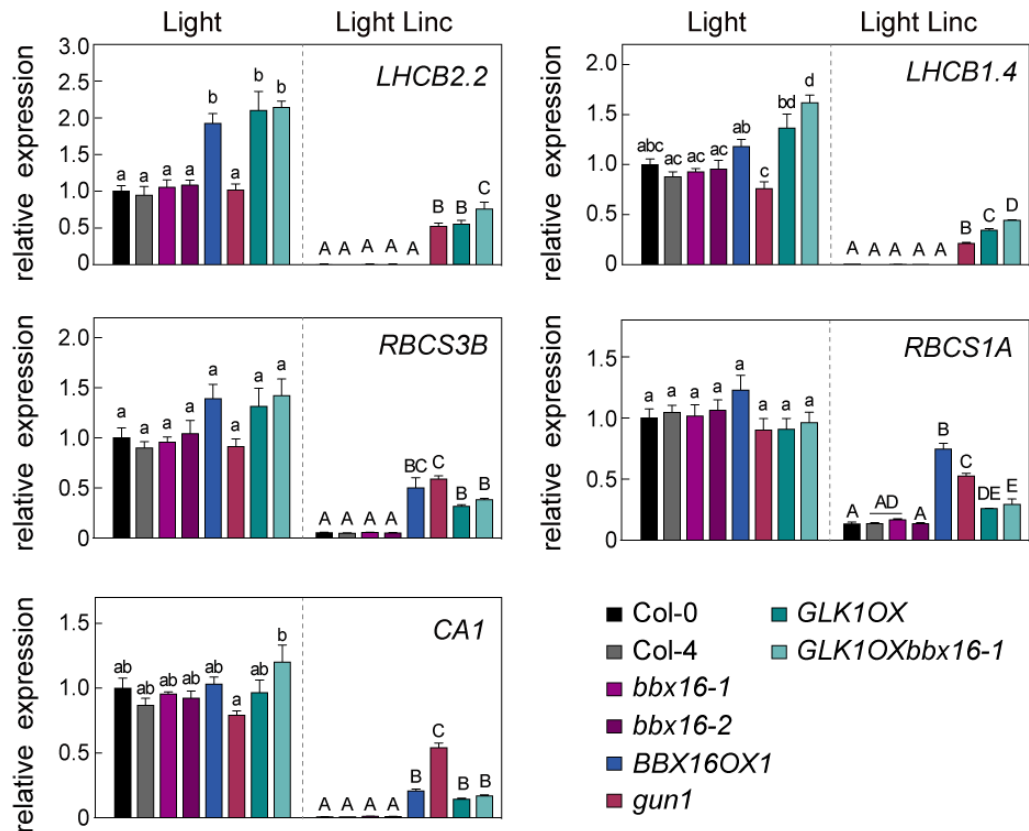

Figure 6

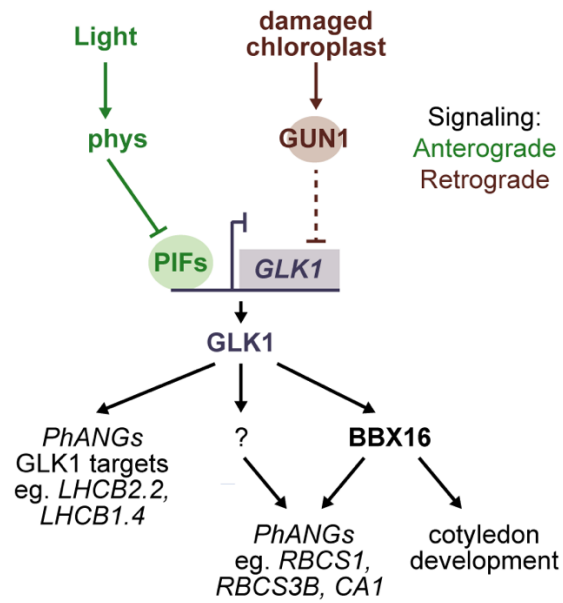

Figure 7
